# Supplementary material for: Performance Assessment of SARS-CoV-2 PCR Assays Developed by WHO Referral Laboratories
Source: J Clin Med. 2020 Jun 16;9(6):1871. doi: 10.3390/jcm9061871 (PMC7355678; doi:10.3390/jcm9061871)
Supplement: Supplementary file 1 [file jcm-09-01871-s001.pdf]

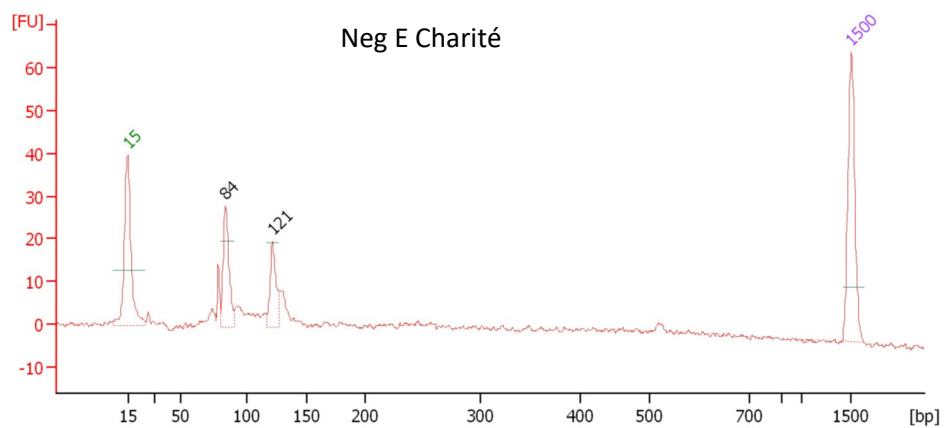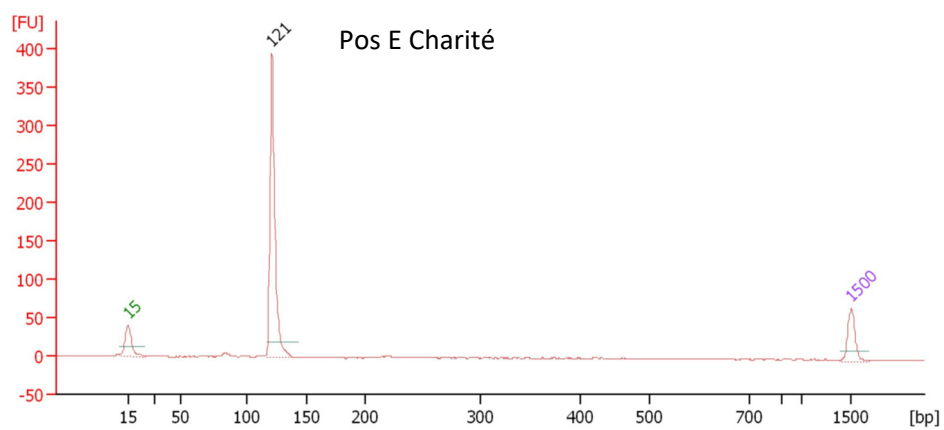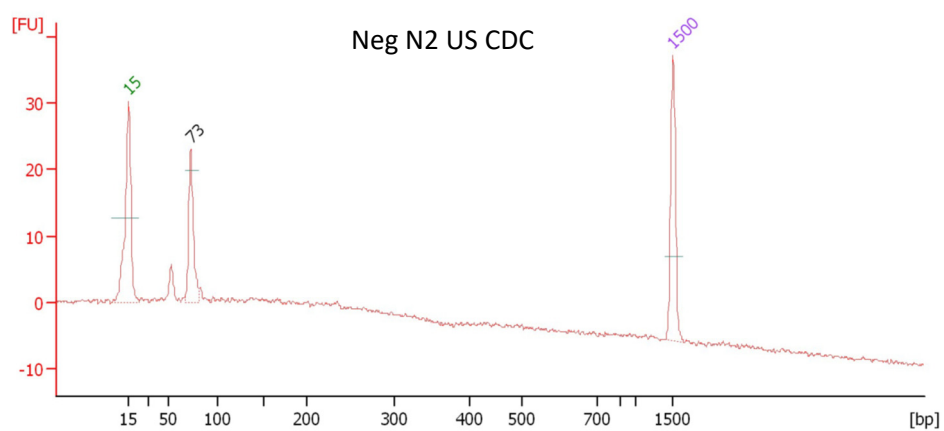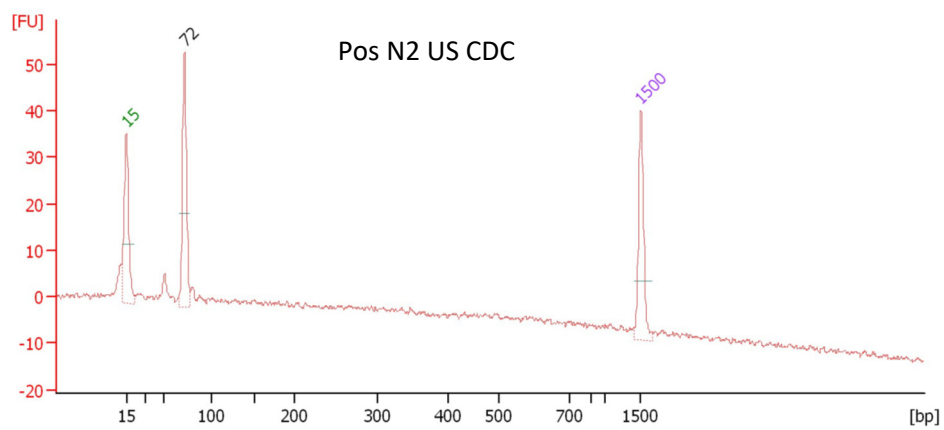

**Figure 1.** Electrophoregrams of amplicon sizes obtained using Agilent DNA 1000 kit (Agilent technologies) for one positive sample (pos) and one negative sample (neg) for E Charité (Germany) and N2 US CDC (United States). Fluorescence unit (FU) is on y-axis and base pairs (bp) on x-axis. One lower marker (15 bp) and one upper marker (1500bp) were used.

**Table 1.** Cycle threshold values and mean  $\pm$  standard deviation for serial dilutions of SARS-CoV-2 cell culture supernatants obtained using IP2 and IP4 Institut Pasteur, Paris (France) when used in simplex and multiplex.

|                                | Ct values                           |                |                |                |
|--------------------------------|-------------------------------------|----------------|----------------|----------------|
|                                | Institut Pasteur,<br>Paris (France) |                |                |                |
|                                | Simplex                             |                | Multiplex      |                |
|                                | Ip2                                 | Ip4            | Ip2            | Ip4            |
| 10 <sup>-3</sup>               | 22.3                                | 26.6           | 21.0           | 20.9           |
| 10 <sup>-4</sup>               | 25.8                                | 30.1           | 24.2           | 24.1           |
| 10 <sup>-5</sup>               | 28.9                                | 33.6           | 28.0           | 27.6           |
|                                | 29.0                                | 33.6           | 27.8           | 27.7           |
|                                | 29.1                                | 34.5           | 28.1           | 27.8           |
| Mean $\pm$ sd 10 <sup>-5</sup> | 29.0 $\pm$ 0.2                      | 33.9 $\pm$ 0.5 | 28.0 $\pm$ 0.2 | 27.7 $\pm$ 7   |
| 10 <sup>-6</sup>               | 32.1                                | 39.1           | 31.5           | 31.2           |
|                                | 32.3                                | 37.9           | 31.5           | 31.1           |
|                                | 32.2                                | 37.7           | 31.3           | 31.0           |
| Mean $\pm$ sd 10 <sup>-6</sup> | 32.2 $\pm$ 0.1                      | 38.2 $\pm$ 0.8 | 31.4 $\pm$ 0.1 | 31.1 $\pm$ 0.1 |
| 10 <sup>-7</sup>               | 36.5                                | 38.6           | 34.3           | 34.3           |
|                                | 35.2                                | 40.7           | 35.0           | 35.0           |
|                                | 35.9                                | 38.5           | 34.6           | 34.1           |
|                                | 35.8                                | N              | 35.2           | 34.3           |
|                                | 38.9                                | 46.6           | 34.3           | 33.9           |
| Mean $\pm$ sd 10 <sup>-7</sup> | 36.5 $\pm$ 1.4                      | 41.1 $\pm$ 3.8 | 34.7 $\pm$ 0.4 | 34.3 $\pm$ 04  |
| 10 <sup>-8</sup>               | 39.1                                | ND             | ND             | 37.0           |
|                                | ND                                  | ND             | 42.1           | 37.0           |
|                                | 37.1                                | ND             | 38.7           | ND             |
|                                | 39.1                                | ND             | ND             | ND             |
|                                | 37.6                                | ND             | 36.2           | 36.1           |
| Mean $\pm$ sd 10 <sup>-8</sup> | 38.2 $\pm$ 1.0                      | NA             | 39.0 $\pm$ 3.0 | 36.7 $\pm$ 0.5 |
| 10 <sup>-9</sup>               | ND                                  | ND             | 39.9           | 38.8           |
|                                | ND                                  | ND             | 39.3           | ND             |
|                                | ND                                  | ND             | 38.4           | ND             |
|                                | ND                                  | ND             | ND             | ND             |
|                                | ND                                  | ND             | ND             | ND             |
| Mean $\pm$ sd 10 <sup>-9</sup> | NA                                  | NA             | 39.2 $\pm$ 0.8 | NA             |
| Water 1                        | ND                                  | ND             | ND             | ND             |
| Water 2                        | ND                                  | ND             | ND             | ND             |

ND (non-detected) indicates a negative result for one replicate, NA (non-applicable).

**Table 2.** Cycle threshold values and mean  $\pm$  standard deviation (sd) for serial dilutions ( $10^{-3}$  to  $10^{-9}$ ) of SARS-CoV-2 cell culture supernatants obtained using five RT-PCR assays for SARS-CoV-2 detection made available by WHO.

|                         | Cycle threshold                          |                |                |      |                            |                |                           |                |                                |      |                |                                          |                  |
|-------------------------|------------------------------------------|----------------|----------------|------|----------------------------|----------------|---------------------------|----------------|--------------------------------|------|----------------|------------------------------------------|------------------|
|                         | Charité (Germany)<br>[5,6]<br>[5,6][5,6] |                |                |      | HKU (Hong-Kong)<br>[10,11] |                | China CDC (China)<br>[12] |                | US CDC (United-States)<br>[13] |      |                | Institut Pasteur, Paris<br>(France) [14] |                  |
|                         | RdRp S                                   | RdRp NS        | N              | E    | N                          | ORF            | N                         | ORF            | N1                             | N2   | N3             | Ip2<br>Multiplex                         | Ip4<br>Multiplex |
| $10^{-3}$               | 23.9                                     | 26.3           | 26.0           | 20.6 | 25.5                       | 26.2           | 23.6                      | 23.3           | 22.4                           | 21.6 | 21.8           | 21.0                                     | 20.9             |
| $10^{-4}$               | 27.2                                     | 28.3           | 29.3           | 23.5 | 28.8                       | 29.7           | 27.0                      | 27.1           | 25.6                           | 25.2 | 25.3           | 24.2                                     | 24.1             |
| $10^{-5}$               | 30.1                                     | 31.2           | 32.7           | 27.4 | 31.3                       | 31.8           | 30.4                      | 31.3           | 29.1                           | 28.8 | 28.8           | 28.0                                     | 27.6             |
|                         | 29.4                                     | 31.3           | 32.6           | 27.2 | 31.4                       | 31.9           | 30.4                      | 31.0           | 29.1                           | 28.8 | 28.7           | 27.8                                     | 27.7             |
|                         | 30.1                                     | 31.1           | 32.7           | 27.2 | 31.6                       | 31.9           | 30.4                      | 31.2           | 29.1                           | 28.8 | 28.5           | 28.1                                     | 27.8             |
| Mean $\pm$ sd $10^{-5}$ | 29.9 $\pm$ 0.4                           | 31.2 $\pm$ 0.1 | 32.7 $\pm$ 0.1 | NA   | 31.4 $\pm$ 0.2             | 31.9 $\pm$ 0.1 | 30.4 $\pm$ 0.0            | 31.2 $\pm$ 0.1 | 29.1 $\pm$ 0.0                 | NA   | 28.7 $\pm$ 0.2 | 28.0 $\pm$ 0.2                           | 27.7 $\pm$ 7     |
| $10^{-6}$               | 33.6                                     | 34.0           | 35.6           | 30.3 | 35.0                       | 35.6           | 33.5                      | 35.1           | 32.3                           | 32.5 | 31.9           | 31.5                                     | 31.2             |
|                         | ND                                       | 33.5           | 35.3           | 31.1 | 35.0                       | 34.7           | 33.5                      | 35.4           | 32.6                           | 32.1 | 31.9           | 31.5                                     | 31.1             |
|                         | ND                                       | 33.8           | 35.4           | 30.8 | 35.3                       | 35.0           | 33.6                      | 34.8           | 32.2                           | 32.3 | 31.9           | 31.3                                     | 31.0             |
| Mean $\pm$ sd $10^{-6}$ | NA                                       | 33.8 $\pm$ 0.2 | 35.4 $\pm$ 0.2 | NA   | 35.1 $\pm$ 0.2             | 35.1 $\pm$ 0.5 | 33.6 $\pm$ 0.0            | 35.1 $\pm$ 0.3 | 32.4 $\pm$ 0.2                 | NA   | 31.9 $\pm$ 0.0 | 31.4 $\pm$ 0.1                           | 31.1 $\pm$ 0.1   |
| $10^{-7}$               | ND                                       | ND             | 38.7           | 33.5 | 39.4                       | 37.9           | 36.3                      | ND             | 36.0                           | 34.4 | 37.1           | 34.3                                     | 34.3             |
|                         | ND                                       | ND             | 38.7           | 33.1 | ND                         | 38.2           | 36.4                      | 39.6           | 36.4                           | 34.4 | 34.8           | 35.0                                     | 35.0             |
|                         | ND                                       | ND             | 38.4           | 34.3 | 39.2                       | 39.8           | 36.9                      | ND             | 35.4                           | 34.4 | 34.5           | 34.6                                     | 34.1             |
|                         | ND                                       | ND             | 37.2           | 35.1 | ND                         | ND             | 36.7                      | ND             | 36.0                           | 34.2 | 34.5           | 35.2                                     | 34.3             |
|                         | ND                                       | ND             | 38.0           | 33.7 | 39.1                       | 37.5           | 37.0                      | 39.8           | 35.9                           | 35.2 | ND             | 34.3                                     | 33.9             |
| Mean $\pm$ sd $10^{-7}$ | NA                                       | NA             | 38.2 $\pm$ 0.6 | NA   | 39.2 $\pm$ 0.2             | 38.4 $\pm$ 1.0 | 36.7 $\pm$ 0.3            | 39.7 $\pm$ 0.1 | 35.9 $\pm$ 0.4                 | NA   | 35.2 $\pm$ 1.3 | 34.7 $\pm$ 0.4                           | 34.3 $\pm$ 0.4   |
| $10^{-8}$               | ND                                       | ND             | 38.5           | 36.2 | ND                         | ND             | ND                        | ND             | 37.5                           | 35.5 | 37.1           | ND                                       | 37.0             |
|                         | ND                                       | ND             | ND             | 38.0 | ND                         | ND             | 39.3                      | ND             | 38.4                           | 35.7 | 37.8           | 42.1                                     | 37.0             |
|                         | ND                                       | ND             | ND             | 38.4 | ND                         | ND             | 38.1                      | ND             | 38.0                           | 35.0 | 38.4           | 38.7                                     | ND               |
|                         | ND                                       | ND             | 39.9           | ND   | ND                         | ND             | ND                        | ND             | ND                             | 34.9 | 37.5           | ND                                       | ND               |
|                         | ND                                       | ND             | 44.6           | 36.9 | ND                         | ND             | ND                        | ND             | 38.5                           | 34.7 | 38.2           | 36.2                                     | 36.1             |
| Mean $\pm$ sd $10^{-8}$ | NA                                       | NA             | 41.0 $\pm$ 3.2 | NA   | NA                         | NA             | 38.7 $\pm$ 0.8            | NA             | 38.1 $\pm$ 0.5                 | NA   | 37.8 $\pm$ 0.5 | 39.0 $\pm$ 3.0                           | 36.7 $\pm$ 0.5   |
| $10^{-9}$               | ND                                       | ND             | ND             | 35.7 | ND                         | ND             | ND                        | ND             | ND                             | 35.3 | 38.6           | 39.9                                     | 38.8             |
|                         | ND                                       | ND             | ND             | 39.7 | ND                         | ND             | 39.5                      | ND             | ND                             | 35.3 | ND             | 39.3                                     | ND               |
|                         | ND                                       | ND             | ND             | 38.5 | ND                         | ND             | ND                        | ND             | ND                             | 35.1 | 38.2           | 38.4                                     | ND               |
|                         | ND                                       | ND             | ND             | 35.5 | ND                         | ND             | ND                        | ND             | ND                             | 35.1 | ND             | ND                                       | ND               |
|                         | ND                                       | ND             | ND             | 36.2 | ND                         | ND             | ND                        | ND             | 41.3                           | 35.1 | ND             | ND                                       | ND               |
| Mean $\pm$ sd $10^{-9}$ | NA                                       | NA             | NA             | NA   | NA                         | NA             | NA                        | NA             | NA                             | NA   | 38.4 $\pm$ 0.2 | 39.2 $\pm$ 0.8                           | NA               |

|         |    |    |    |      |    |    |    |    |    |      |    |    |    |
|---------|----|----|----|------|----|----|----|----|----|------|----|----|----|
| Water 1 | ND | ND | ND | 38.5 | ND | ND | ND | ND | ND | 35.6 | ND | ND | ND |
| Water 2 | ND | ND | ND | 37.2 | ND | ND | ND | ND | ND | 35.5 | ND | ND | ND |

ND (non-detected) indicates a negative result for one replicate, NA (non-applicable).

**Table 3.** Cycle thresholds values obtained on four clinical samples using five RT-PCR assays for SARS-CoV-2 detection made available by WHO.

|          | Cycle threshold            |        |      |      |                         |      |                           |      |                                |      |      |                                          |                |
|----------|----------------------------|--------|------|------|-------------------------|------|---------------------------|------|--------------------------------|------|------|------------------------------------------|----------------|
|          | Charité (Germany)<br>[5,6] |        |      |      | HKU (Hong-Kong) [10,11] |      | China CDC (China)<br>[12] |      | US CDC (United-States)<br>[13] |      |      | Institut Pasteur, Paris<br>(France) [14] |                |
|          | RdRp S                     | RdRp G | N    | E    | N                       | ORF  | N                         | ORF  | N1                             | N2   | N3   | Ip2<br>Simplex                           | Ip4<br>Simplex |
| Positive | 23.3                       | 25.4   | 25.1 | 20.7 | 22.5                    | 21.6 | 22.4                      | 20.9 | 20.5                           | 20.5 | 20.4 | 20.0                                     | 20.4           |
| Positive | 26.8                       | 30.1   | 28.8 | 25.4 | 26.3                    | 25.7 | 26.6                      | 25.2 | 24.9                           | 25.0 | 24.4 | 24.5                                     | 24.6           |
| Positive | 31.3                       | ND     | 32.5 | 29.3 | 30.2                    | 30.0 | 30.3                      | 30.0 | 28.4                           | 28.7 | 28.1 | 29.1                                     | 29.7           |
| Positive | ND                         | ND     | ND   | 35.0 | 36.8                    | 36.2 | 36.0                      | 36.1 | 34.5                           | 34.1 | 34.4 | 34.5                                     | 35.8           |
| Water 3  | ND                         | ND     | ND   | 36.4 | ND                      | ND   | ND                        | ND   | ND                             | 35.3 | ND   | ND                                       | ND             |

ND (non-detected) indicates a negative result.

**Table 4.** Cycle threshold values obtained on clinical samples (n=16) using the three most sensitive methods: N China CDC, N1 US CDC, and IP2 Institut Pasteur, Paris (France).

|                    | Cycle threshold           |                                   |                                          |
|--------------------|---------------------------|-----------------------------------|------------------------------------------|
|                    | China CDC<br>(China) [12] | US CDC<br>(United-States)<br>[13] | Institut Pasteur,<br>Paris (France) [14] |
|                    | N                         | N1                                | IP2 Simplex                              |
| Positive sample 5  | 27.76                     | 25.79                             | 26.88                                    |
| Positive sample 6  | 28.75                     | 27.28                             | 27.24                                    |
| Positive sample 7  | 29.1                      | 27.12                             | 27.74                                    |
| Positive sample 8  | 30.41                     | 29.09                             | 29.14                                    |
| Positive sample 9  | 30.71                     | 29.37                             | 29.38                                    |
| Positive sample 10 | 31.14                     | 29.32                             | 29.51                                    |
| Positive sample 11 | 31.03                     | 29.1                              | 30.15                                    |
| Positive sample 12 | 30.85                     | 29.72                             | 29.81                                    |
| Positive sample 13 | 31.41                     | 29.58                             | 30.06                                    |
| Positive sample 14 | 31.86                     | 30.46                             | 30.87                                    |
| Positive sample 15 | 32.4                      | 30.52                             | 33.07                                    |
| Positive sample 16 | 33.29                     | 32.82                             | 33.17                                    |
| Positive sample 17 | 34.03                     | 33.35                             | 33.35                                    |
| Positive sample 18 | 34.33                     | 33.19                             | 33.51                                    |
| Positive sample 19 | 36.19                     | 34.36                             | 35.36                                    |
| Positive sample 20 | 36.82                     | 36.11                             | 38.68                                    |
| Water 4            | ND                        | ND                                | ND                                       |
| Water 5            | ND                        | ND                                | ND                                       |

ND (non-detected) indicates a negative result.

**Table 5.** Specificity assessment of five RT-PCR assays made available by WHO.

| 9                                          | Cycle threshold            |         |    |       |                         |     |      |     |                        |       |                                       |               |               |  |
|--------------------------------------------|----------------------------|---------|----|-------|-------------------------|-----|------|-----|------------------------|-------|---------------------------------------|---------------|---------------|--|
|                                            | Charité (Germany)<br>[5,6] |         |    |       | China CDC (China)       |     |      |     | US CDC (United-States) |       | Institut Pasteur, Paris (France) [14] |               |               |  |
|                                            |                            |         |    |       | HKU (Hong-Kong) [10,11] |     | [12] |     | [13]                   |       |                                       |               |               |  |
|                                            | RdRp S                     | RdRp NS | N  | E     | N                       | ORF | N    | ORF | N1                     | N2    | N3                                    | Ip2 Multiplex | Ip4 Multiplex |  |
| Negative sample                            | ND                         | ND      | ND | 37.4  | ND                      | ND  | ND   | ND  | ND                     | 35.7  | ND                                    | ND            | ND            |  |
| Negative sample                            | ND                         | ND      | ND | 38.3  | ND                      | ND  | ND   | ND  | ND                     | 35.5  | ND                                    | ND            | ND            |  |
| Negative sample                            | ND                         | ND      | ND | 37.8  | ND                      | ND  | ND   | ND  | ND                     | 35.9  | ND                                    | ND            | ND            |  |
| Negative sample                            | ND                         | ND      | ND | 35.9  | ND                      | ND  | ND   | ND  | ND                     | 35.2  | ND                                    | ND            | ND            |  |
| Negative sample                            | ND                         | ND      | ND | 33.83 | ND                      | ND  | ND   | ND  | ND                     | 34.35 | ND                                    | ND            | ND            |  |
| Negative sample                            | ND                         | ND      | ND | 33.04 | ND                      | ND  | ND   | ND  | ND                     | 34.6  | ND                                    | ND            | ND            |  |
| Negative sample                            | ND                         | ND      | ND | 33.84 | ND                      | ND  | ND   | ND  | ND                     | 33.56 | ND                                    | ND            | ND            |  |
| Negative sample                            | ND                         | ND      | ND | 33.26 | ND                      | ND  | ND   | ND  | ND                     | 33.82 | ND                                    | ND            | ND            |  |
| Negative sample                            | ND                         | ND      | ND | 33.43 | ND                      | ND  | ND   | ND  | ND                     | 34.17 | ND                                    | ND            | ND            |  |
| Negative sample                            | ND                         | ND      | ND | 37.03 | ND                      | ND  | ND   | ND  | ND                     | 33.75 | ND                                    | ND            | ND            |  |
| Negative sample                            | ND                         | ND      | ND | 34.57 | ND                      | ND  | ND   | ND  | ND                     | 34.13 | ND                                    | ND            | ND            |  |
| Negative sample                            | ND                         | ND      | ND | 33.6  | ND                      | ND  | ND   | ND  | ND                     | 34.75 | ND                                    | ND            | ND            |  |
| Negative sample                            | ND                         | ND      | ND | 39.69 | ND                      | ND  | ND   | ND  | ND                     | 34.07 | ND                                    | ND            | ND            |  |
| Negative sample                            | ND                         | ND      | ND | 34.71 | ND                      | ND  | ND   | ND  | ND                     | 34.54 | ND                                    | ND            | ND            |  |
| Negative sample                            | ND                         | ND      | ND | 34.8  | ND                      | ND  | ND   | ND  | ND                     | 34.18 | ND                                    | ND            | ND            |  |
| Negative sample                            | ND                         | ND      | ND | 38.83 | ND                      | ND  | ND   | ND  | ND                     | 33.95 | ND                                    | ND            | ND            |  |
| Negative sample                            | ND                         | ND      | ND | 33.6  | ND                      | ND  | ND   | ND  | ND                     | 33.67 | ND                                    | ND            | ND            |  |
| Negative sample                            | ND                         | ND      | ND | 32.65 | ND                      | ND  | ND   | ND  | ND                     | 34.36 | ND                                    | ND            | ND            |  |
| Negative sample                            | ND                         | ND      | ND | 34.4  | ND                      | ND  | ND   | ND  | ND                     | 33.96 | ND                                    | ND            | ND            |  |
| Negative sample                            | ND                         | ND      | ND | 33.85 | ND                      | ND  | ND   | ND  | ND                     | 34.15 | ND                                    | ND            | ND            |  |
| Sample positive for Adenovirus             | ND                         | ND      | ND | 33.1  | ND                      | ND  | ND   | ND  | ND                     | 33.77 | ND                                    | ND            | ND            |  |
| Sample positive for Human coronavirus 229E | ND                         | ND      | ND | 33.27 | ND                      | ND  | ND   | ND  | ND                     | 34.07 | ND                                    | ND            | ND            |  |

|                                                                                |    |    |    |       |    |    |    |    |    |       |    |    |    |
|--------------------------------------------------------------------------------|----|----|----|-------|----|----|----|----|----|-------|----|----|----|
| Sample positive for Human coronavirus HKU1                                     | ND | ND | ND | 33.89 | ND | ND | ND | ND | ND | 34.65 | ND | ND | ND |
| Sample positive for Human coronavirus HKU1                                     | ND | ND | ND | 32.8  | ND | ND | ND | ND | ND | 34.37 | ND | ND | ND |
| Sample positive for Human coronavirus HKU1 and human influenza A               | ND | ND | ND | 33.77 | ND | ND | ND | ND | ND | 34.41 | ND | ND | ND |
| Sample positive for Human coronavirus NL63                                     | ND | ND | ND | 35.12 | ND | ND | ND | ND | ND | 33.73 | ND | ND | ND |
| Sample positive for Human coronavirus NL63 and human influenza A               | ND | ND | ND | 34.39 | ND | ND | ND | ND | ND | 34.35 | ND | ND | ND |
| Sample positive for Human coronavirus NL63, human influenza B and Picornavirus | ND | ND | ND | 33.65 | ND | ND | ND | ND | ND | 33.97 | ND | ND | ND |
| Sample positive for Human                                                      | ND | ND | ND | 34.3  | ND | ND | ND | ND | ND | 33.41 | ND | ND | ND |
| Sample positive for Human                                                      | ND | ND | ND | 34.29 | ND | ND | ND | ND | ND | 34.44 | ND | ND | ND |
| Sample positive for Human                                                      | ND | ND | ND | 37.54 | ND | ND | ND | ND | ND | 33.99 | ND | ND | ND |
| Sample positive for Human influenza A and Metapneumovirus                      | ND | ND | ND | 33.23 | ND | ND | ND | ND | ND | 34.35 | ND | ND | ND |
| Sample positive for Human                                                      | ND | ND | ND | 33.44 | ND | ND | ND | ND | ND | 34.13 | ND | ND | ND |
| Sample positive for Human                                                      | ND | ND | ND | 34.42 | ND | ND | ND | ND | ND | 33.8  | ND | ND | ND |
| Sample positive for Human influenza B and Rhinovirus                           | ND | ND | ND | 34.91 | ND | ND | ND | ND | ND | 33.6  | ND | ND | ND |
| Sample positive for                                                            | ND | ND | ND | 34.02 | ND | ND | ND | ND | ND | 33.95 | ND | ND | ND |
| Sample positive for                                                            | ND | ND | ND | 33.74 | ND | ND | ND | ND | ND | 34.97 | ND | ND | ND |
| Sample positive for Metapneumovirus and Rhinovirus                             | ND | ND | ND | 37.73 | ND | ND | ND | ND | ND | 34.46 | ND | ND | ND |
| Sample positive for                                                            | ND | ND | ND | 34.05 | ND | ND | ND | ND | ND | 36.26 | ND | ND | ND |
| Sample positive for                                                            | ND | ND | ND | 32.46 | ND | ND | ND | ND | ND | 35.19 | ND | ND | ND |
| Sample positive for                                                            | ND | ND | ND | 38.18 | ND | ND | ND | ND | ND | 34.12 | ND | ND | ND |

|                                                                                  |       |       |       |       |       |      |       |       |       |       |       |       |       |
|----------------------------------------------------------------------------------|-------|-------|-------|-------|-------|------|-------|-------|-------|-------|-------|-------|-------|
| Sample positive for<br>Parainfluenzavirus 4 and<br>Adenovirus                    | ND    | ND    | ND    | 34.96 | ND    | ND   | ND    | ND    | ND    | 34.67 | ND    | ND    | ND    |
| Sample positive for<br>Picornavirus                                              | ND    | ND    | ND    | 34.04 | ND    | ND   | ND    | ND    | ND    | 34.23 | ND    | ND    | ND    |
| Sample positive for                                                              | ND    | ND    | ND    | 32.75 | ND    | ND   | ND    | ND    | ND    | 34.21 | ND    | ND    | ND    |
| Sample positive for                                                              | ND    | ND    | ND    | 34.56 | ND    | ND   | ND    | ND    | ND    | 33.94 | ND    | ND    | ND    |
| Sample positive for<br>Respiratory syncytial virus<br>and Adenovirus             | ND    | ND    | ND    | 34.08 | ND    | ND   | ND    | ND    | ND    | 34.49 | ND    | ND    | ND    |
| Sample positive for<br>Respiratory syncytial virus<br>and Rhinovirus             | ND    | ND    | ND    | 33.46 | ND    | ND   | ND    | ND    | ND    | 34.08 | ND    | ND    | ND    |
| Sample positive for<br>Respiratory syncytial virus,<br>Adenovirus and Rhinovirus | ND    | ND    | ND    | 34.3  | ND    | ND   | ND    | ND    | ND    | 34.29 | ND    | ND    | ND    |
| Sample positive for<br>Rhinovirus                                                | ND    | ND    | ND    | 33.19 | ND    | ND   | ND    | ND    | ND    | 34.57 | ND    | ND    | ND    |
| Sample positive for<br>Rhinovirus                                                | ND    | ND    | ND    | 33.15 | ND    | ND   | ND    | ND    | ND    | 34.54 | ND    | ND    | ND    |
| Water 4                                                                          | ND    | ND    | ND    | 33.24 | ND    | ND   | ND    | ND    | ND    | 34.13 | ND    | ND    | ND    |
| Positive control                                                                 | 30.83 | 32.39 | 33.35 | 28.52 | 30.79 | 30.4 | 29.21 | 37.97 | 27.14 | 28.09 | 27.84 | 28.22 | 29.97 |

Cycle threshold values are indicated and were obtained on clinical samples tested negative for SARS-CoV-2 (n=50) including samples tested positive for other viruses than SARS-CoV-2 (n=30) and negative samples (n=20). ND (non-detected) indicates a negative result.
